# Supplementary material
Source: Springer Nature journal article supplement (https://www.springermedizin.de/resource/supplementary/12960_2009_223_MOESM1_ESM.pdf/9570678)

# Factors affecting decision-making process

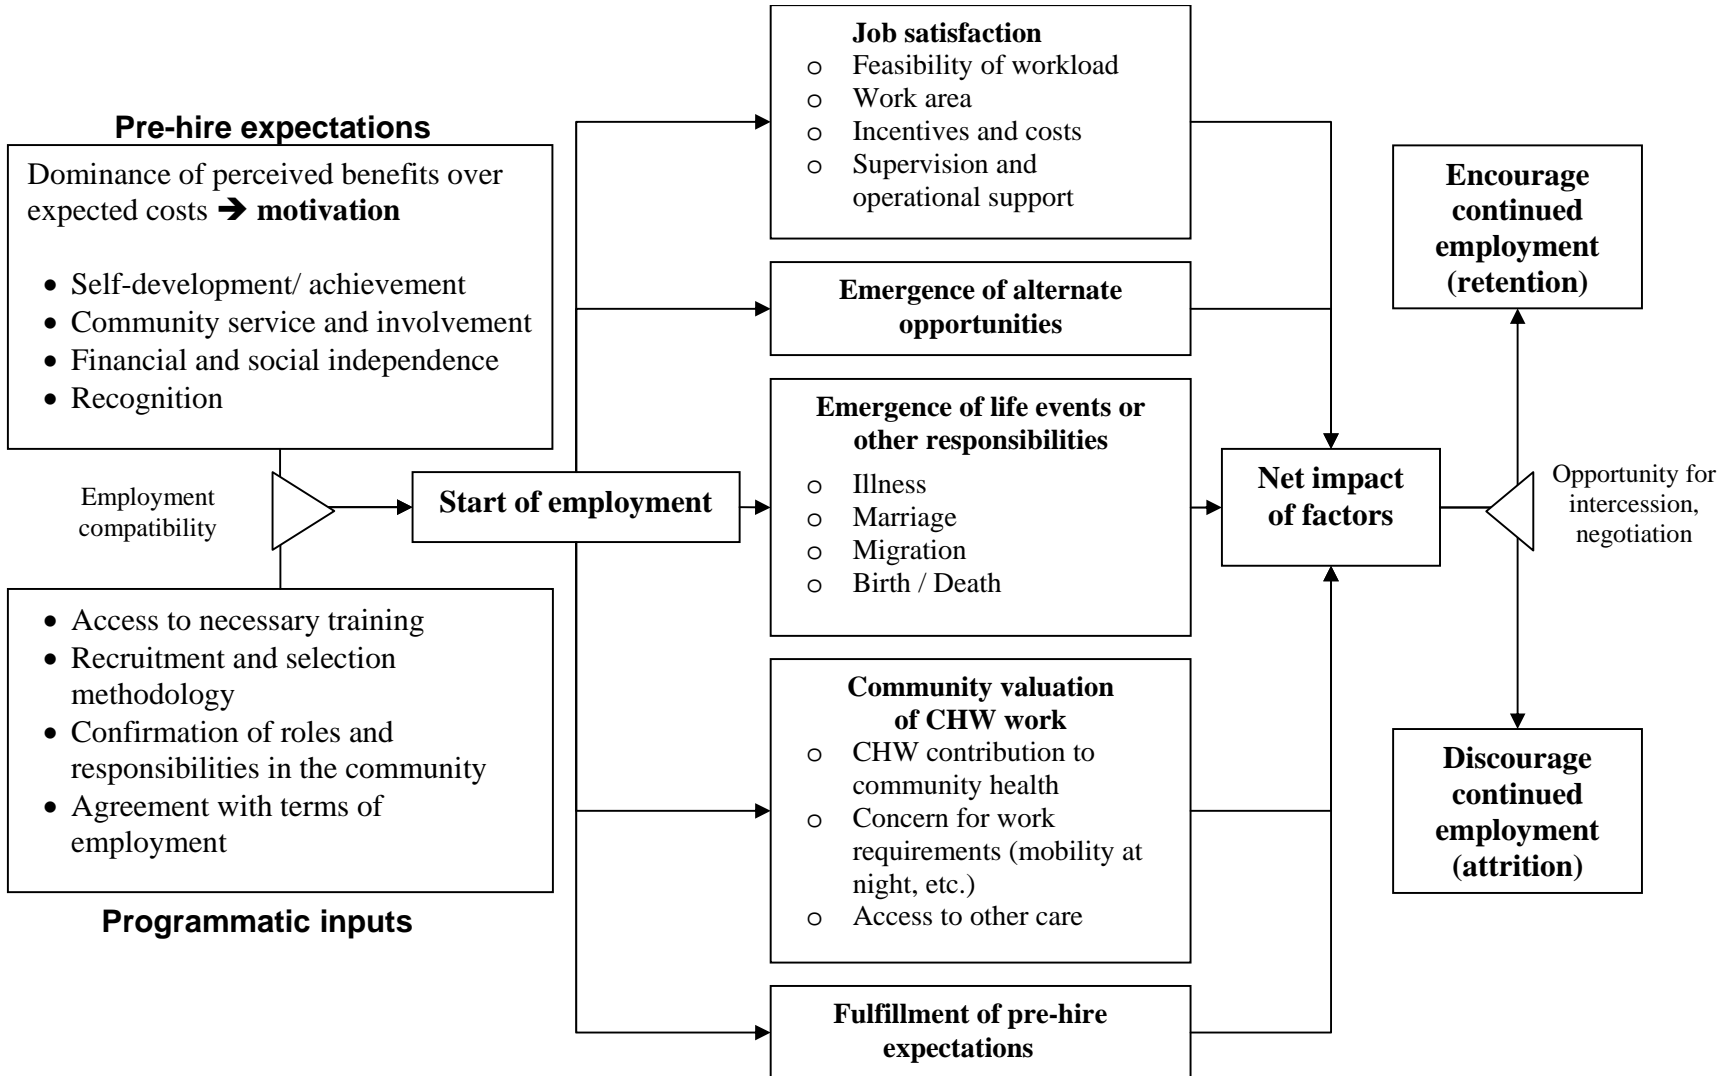

Supplement: MOESM1 [file 9570678]
